# Supplementary material for: Evaluating glioblastoma tumour sphere growth and migration in interaction with astrocytes using 3D collagen-hyaluronic acid hydrogels
Source: Royal Society of Chemistry journal article supplement (doi:10.1039/d3tb00066d), 2023-01-01
Supplement: d3tb00066d2.pdf [file d3tb00066d2.pdf]

**Evaluating glioblastoma tumor sphere growth and migration in interaction with astrocytes using 3D collagen-hyaluronic acid hydrogels**

Yixiao Cui<sup>1</sup>, Paul Lee<sup>2</sup>, Jesse J. Reardon<sup>3,4</sup>, Anna Wang<sup>1</sup>, Skylar Lynch<sup>1</sup>, Jose J. Otero<sup>3,5</sup>, Gina Sizemore<sup>3,4</sup>,  
Jessica O. Winter<sup>1,2,3</sup>

<sup>1</sup>Department of Biomedical Engineering, The Ohio State University, Columbus, OH, USA

<sup>2</sup>William G. Lowrie Department of Chemical and Biomolecular Engineering, The Ohio State University, Columbus, OH, USA

<sup>3</sup>Ohio State University Comprehensive Cancer Center - James, The Ohio State University, Columbus, OH, USA

<sup>4</sup>Department of Radiation Oncology, The Ohio State University, Columbus, OH, USA

<sup>5</sup>Department of Neuroscience, The Ohio State University, Columbus, OH, USA

## Supplementary Figures

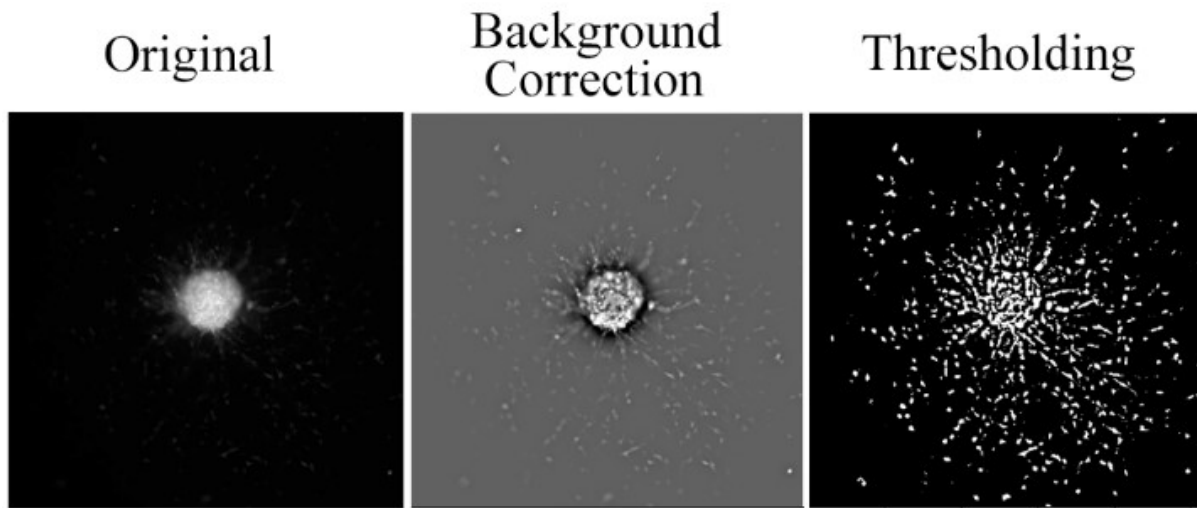

**Supplementary Figure 1.** Example of image processing methods for correcting uneven background and thresholding the images in R studio.

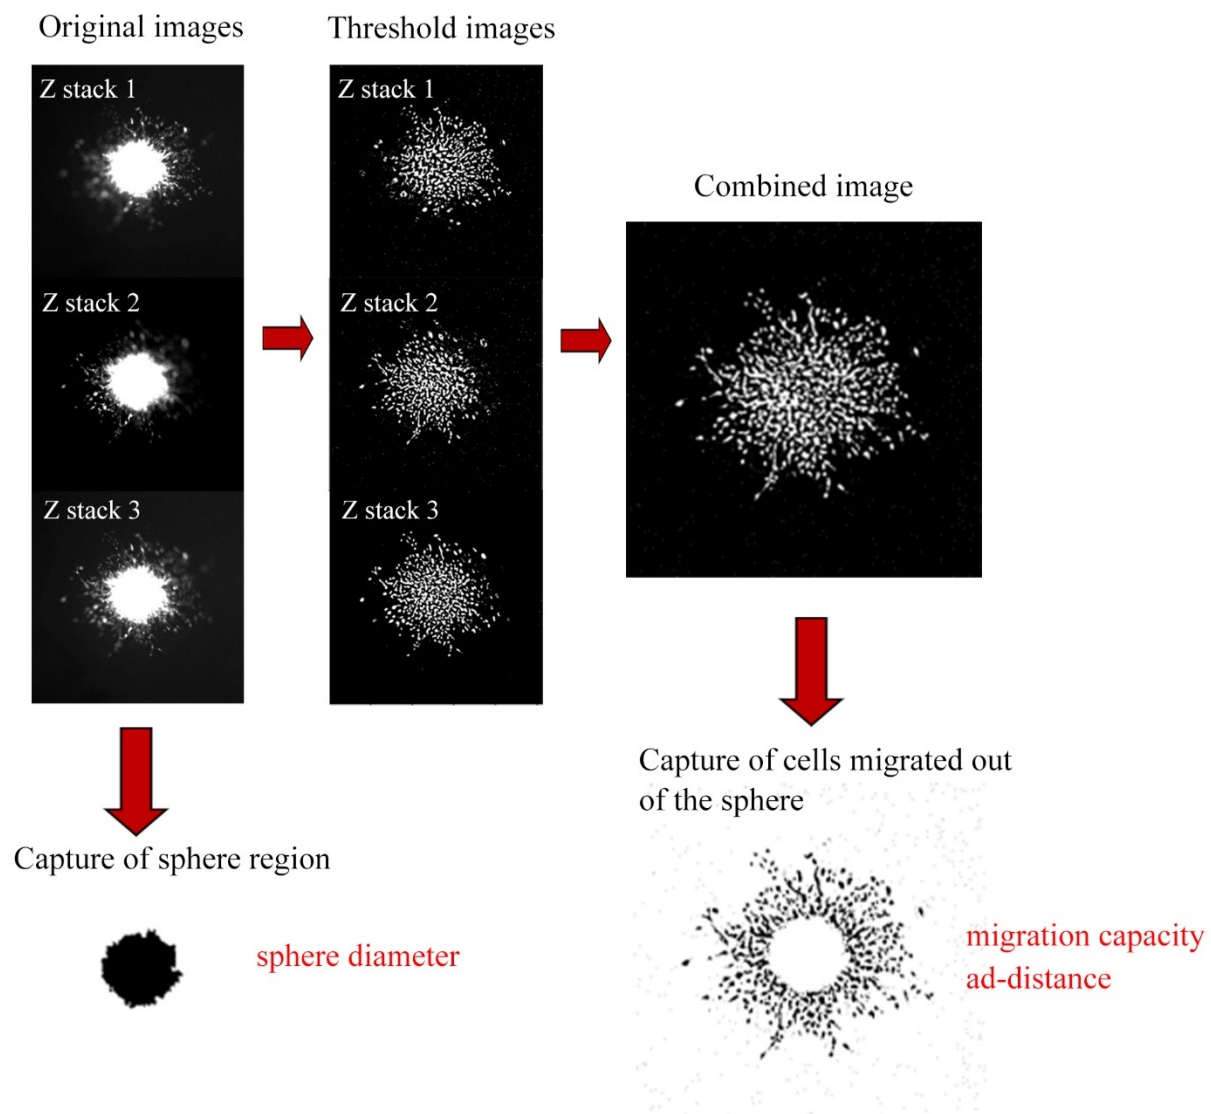

**Supplementary Figure 2.** Schematic and examples of image process methods to measure of sphere diameter, migration capacity, and adjusted migration distance (ad-distance).

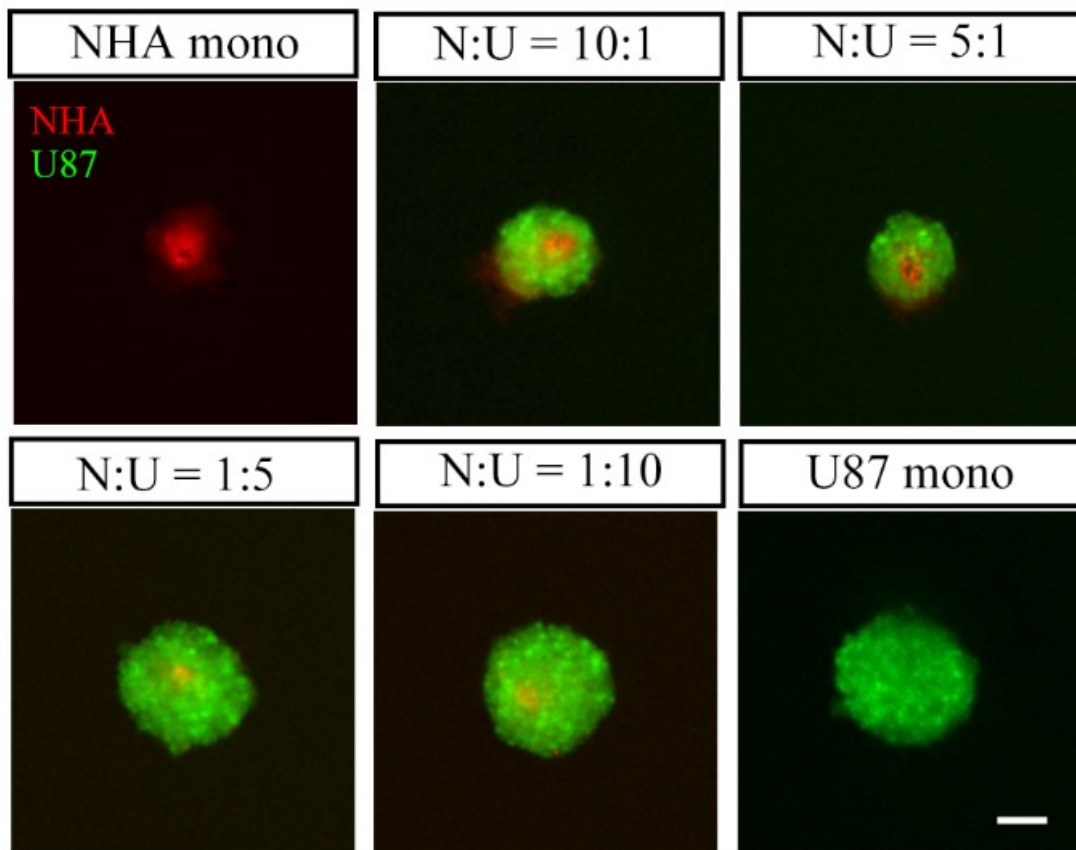

**Supplementary Figure 3.** Examples of normal human astrocyte (NHA) mono-sphere, U87-NHA multi-spheres at NHA:U87 (N:U) ratios of 10:1, 5:1, 1:5, and 1:10, and U87 mono-sphere in liquid culture at day 3. Scale bar = 100  $\mu$ m. U87 glioblastoma (GB) cells are shown in green; NHAs are shown in red.

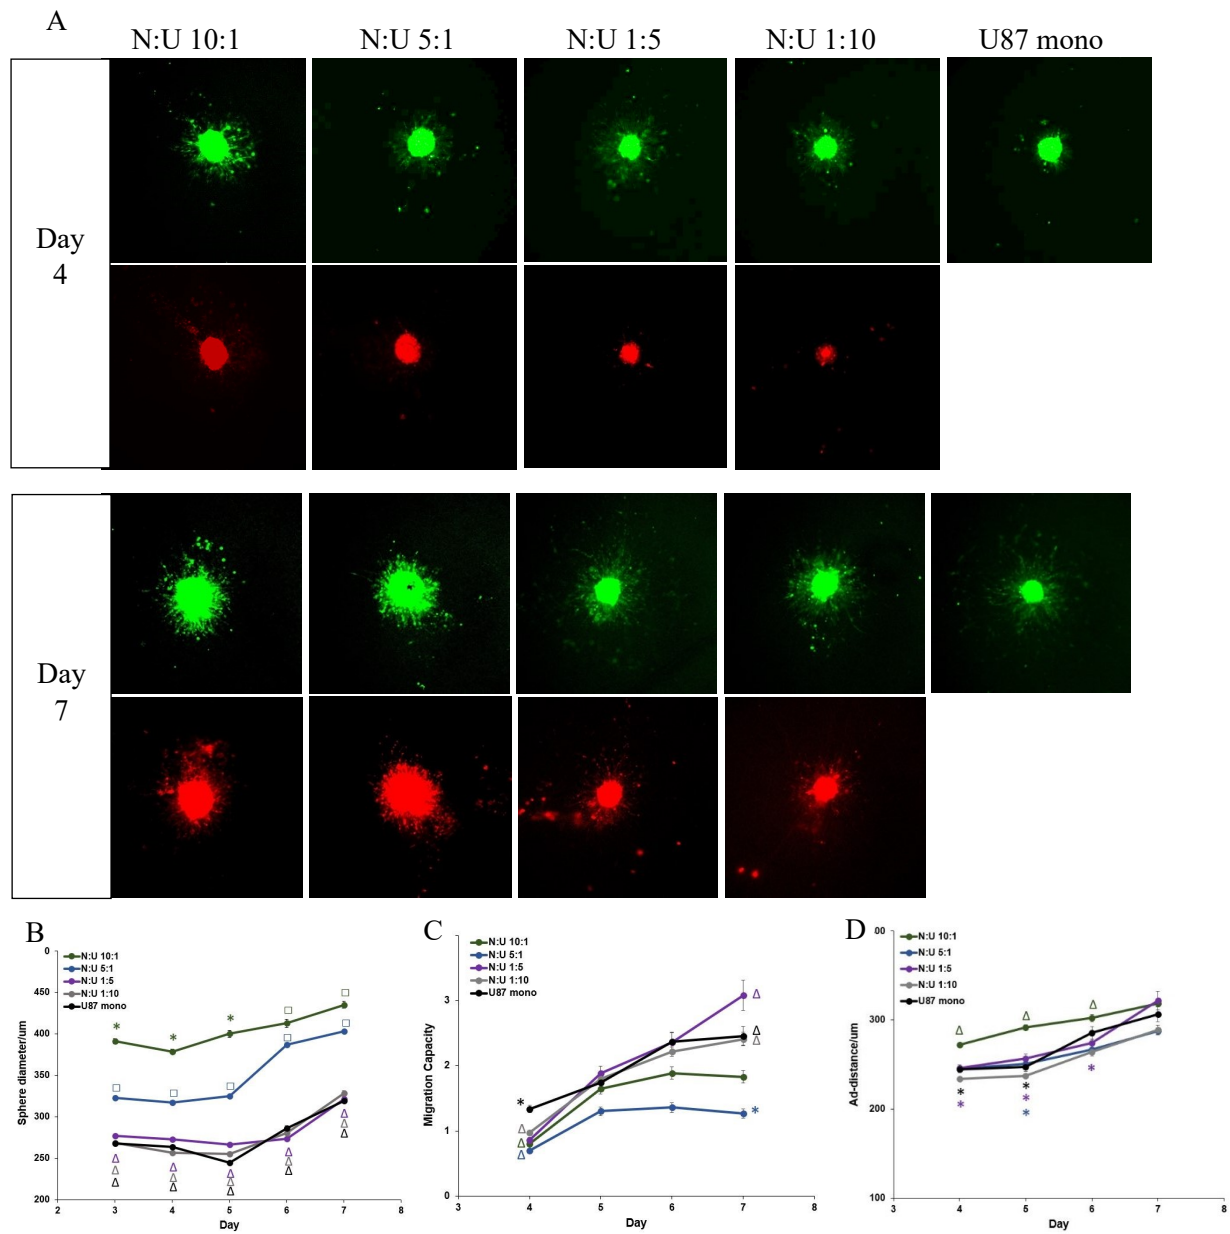

**Supplementary Figure 4.** U87 mono- and U87-NHA multi-spheres encapsulated in collagen-HA gels with an initial seeding density of 1000 U87 cells at different N:U ratios. GB A) Representative images; B) sphere diameter, C) migration capacity, and D) adjusted migration distance (ad-distance) are presented as average  $\pm$  standard error.  $N = 9$  or  $10$ . \*,  $\square$ , and  $\Delta$  are color coded to the respective condition. Different symbol groups indicated conditions that are statistically different on that day.  $P < 0.05$ .

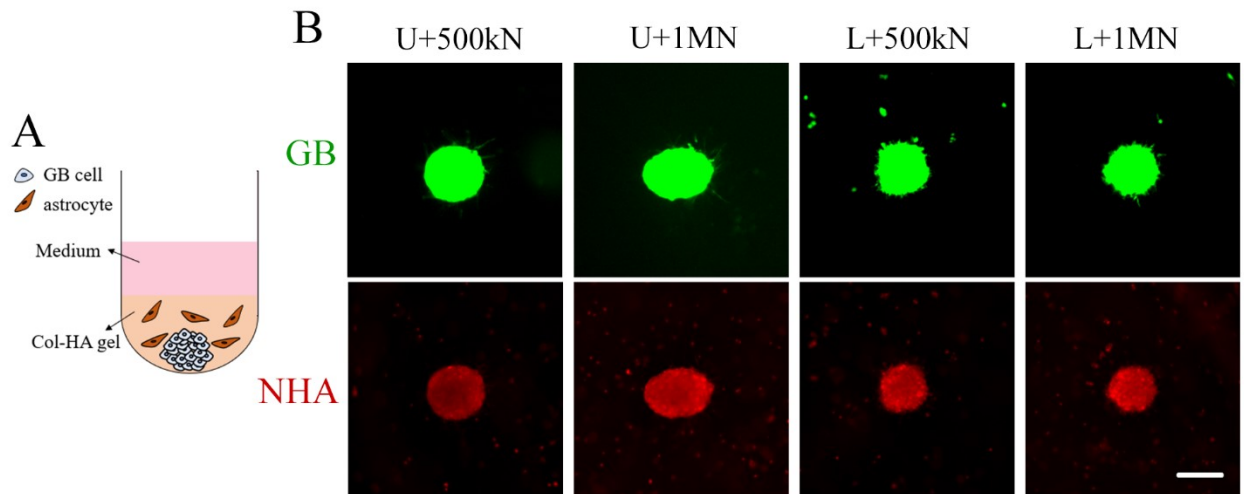

**Supplementary Figure 5.** U87 (U) and LN229 (L) mono-spheres encapsulated in collagen-HA gels loaded with NHAs at concentrations of 500k (500kN) or 1M (1MN) cells/ml: A) Model configuration. B) Representative images of NHA (red) co-localization with glioblastoma cells (green) after encapsulation at day 3. Scale bar = 200  $\mu$ m.

**A**

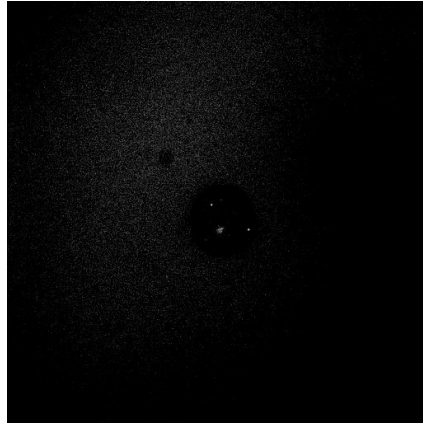

**B**

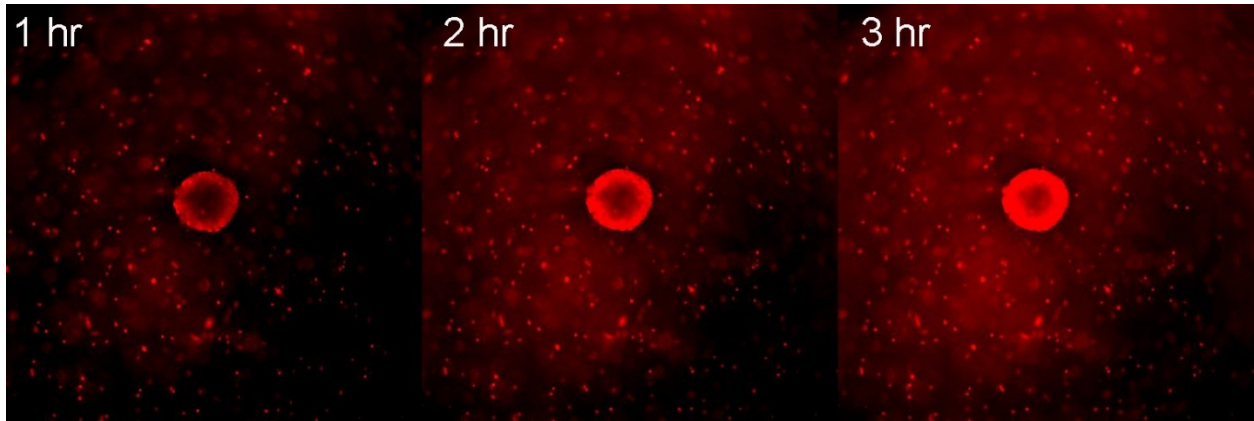

**Supplementary Figure 6.** A) Red (astrocyte) channel image of control sample containing only GB monosphere, indicating lack of significant bleed-through. B) Time lapse images of astrocyte-GB co-localization in GB mono-sphere plus dispersed astrocyte cultures on day 3 showing gradual co-localization.

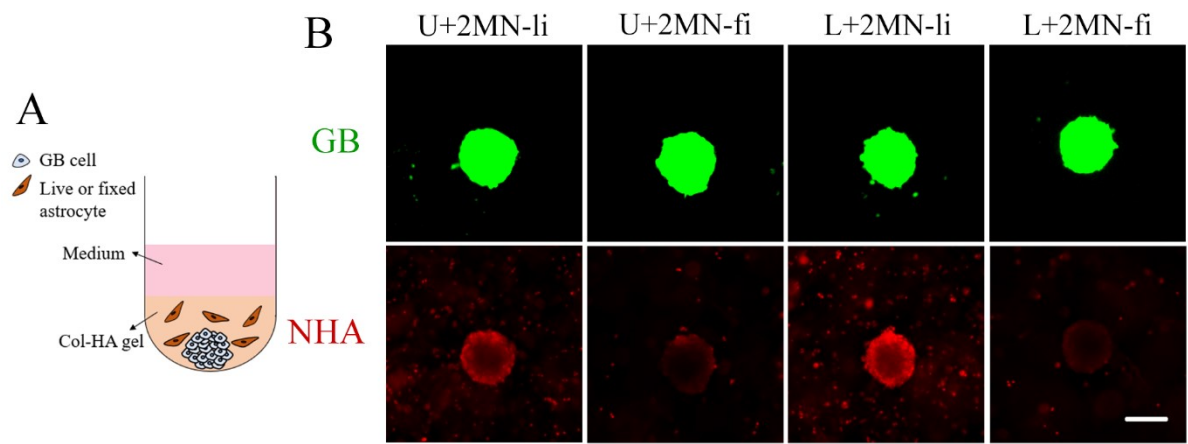

**Supplementary Figure 7.** U87 (U) and LN229 (L) mono-spheres encapsulated in collagen-HA gels loaded with live (2MN-li) or fixed NHAs (2MN-fi) at 2M cells/ml: A) Model configuration B) Representative images of NHA (red) co-localization with glioblastoma cells (green) after encapsulation at day 3. Scale bar = 200  $\mu$ m.

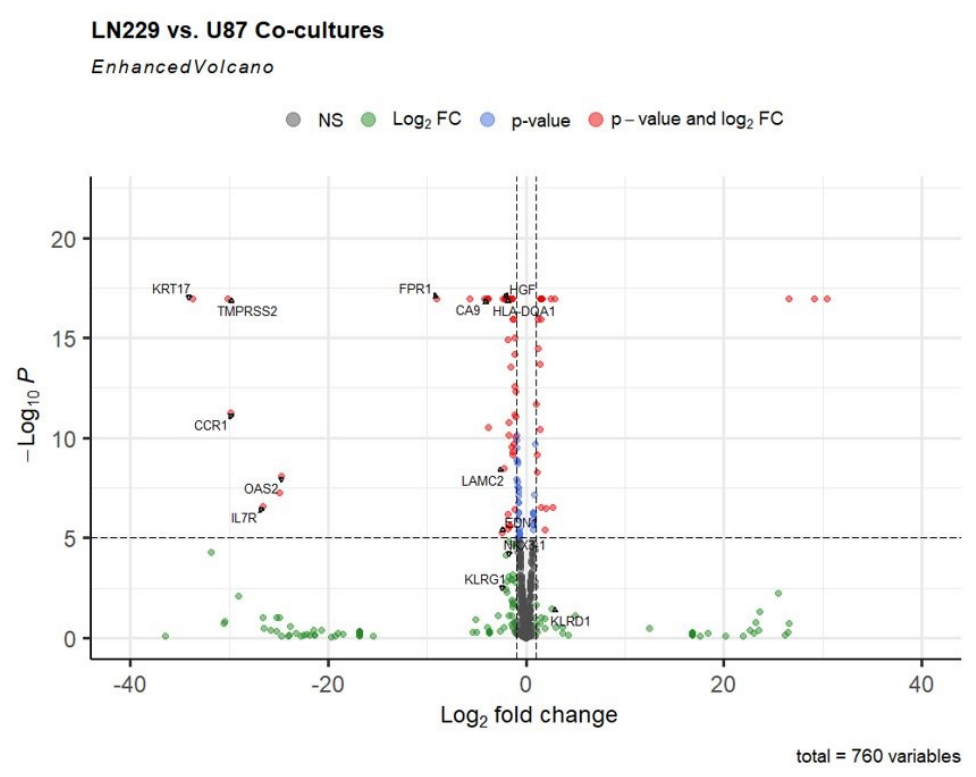

**Supplementary Figure 8.** Volcano plot of differential gene expression for LN229 vs. U87 mono-spheres in co-culture with dispersed astrocytes. NS = not significant,  $\text{Log}_2$  FC =  $\text{log}_2$  fold change > 2, p-value = p-value <  $1\text{E}-5$ . (Note that software cannot detect  $p < 1\text{E}-12$ ). p-value and  $\text{log}_2$  FC = p value < 0.05 and  $\text{log}_2$  FC > 2. The differential expression of these genes is considered statistically significant.



### LN229 vs. U87 Mono-Spheres

EnhancedVolcano

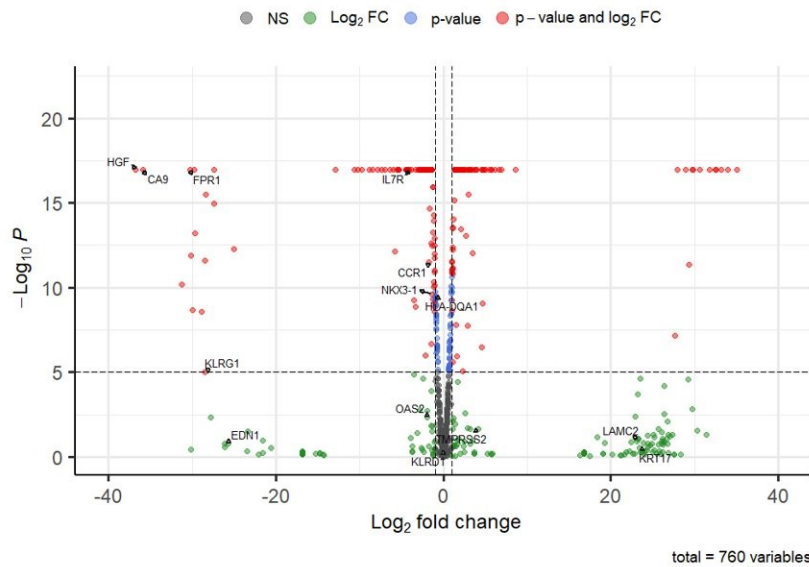

**Supplementary Figure 9.** Volcano plot of differential gene expression for LN229 vs. U87 mono-spheres cultured without astrocytes. NS = not significant,  $\text{Log}_2 \text{FC}$  =  $\log_2$  fold change  $> 2$ , p-value = p-value value  $< 1\text{E}-5$ . (Note that software cannot detect  $p < 1\text{E}-12$ ). p-value and  $\log_2 \text{FC}$  = p value  $< 0.05$  and  $\log_2 \text{FC} > 2$ . The differential expression of these genes is considered statistically significant.

### LN229 Co-culture vs. Seperate Culture

EnhancedVolcano

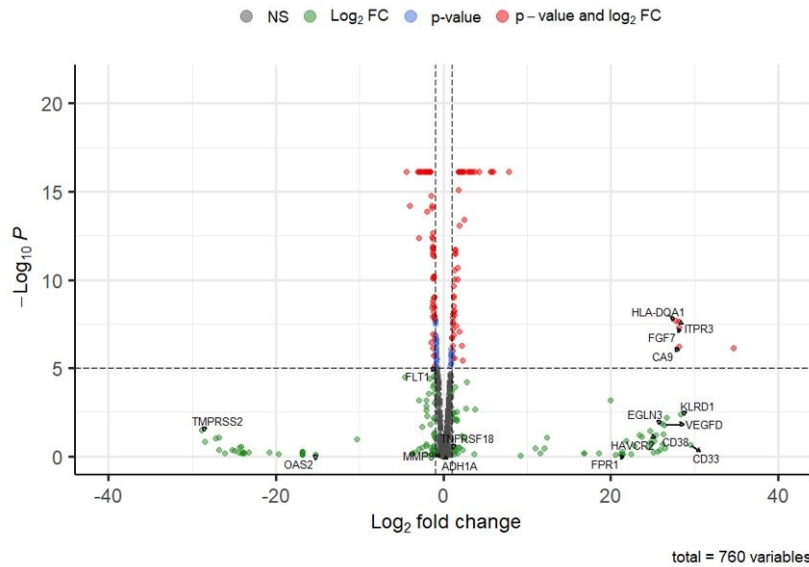

**Supplementary Figure 10.** Volcano plot of differential gene expression for LN229 spheroid co-cultures with dispersed normal human astrocytes and U87 spheroid and astrocyte separate cultures. NS = not significant,  $\text{Log}_2 \text{FC}$  =  $\log_2$  fold change  $> 2$ , p-value = p-value value  $< 1\text{E}-5$ . (Note that software cannot detect  $p < 1\text{E}-12$ ). p-value and  $\log_2 \text{FC}$  = p value  $< 0.05$  and  $\log_2 \text{FC} > 2$ . The differential expression of these genes is considered statistically significant. \*MAGEC2 ( $\log \text{FC} = -43.8$ , p value = 0.62) and KLKR9 ( $\log \text{FC} = 83.2$ , p value = 0.74) could not fit on plot. Neither is statistically significant.

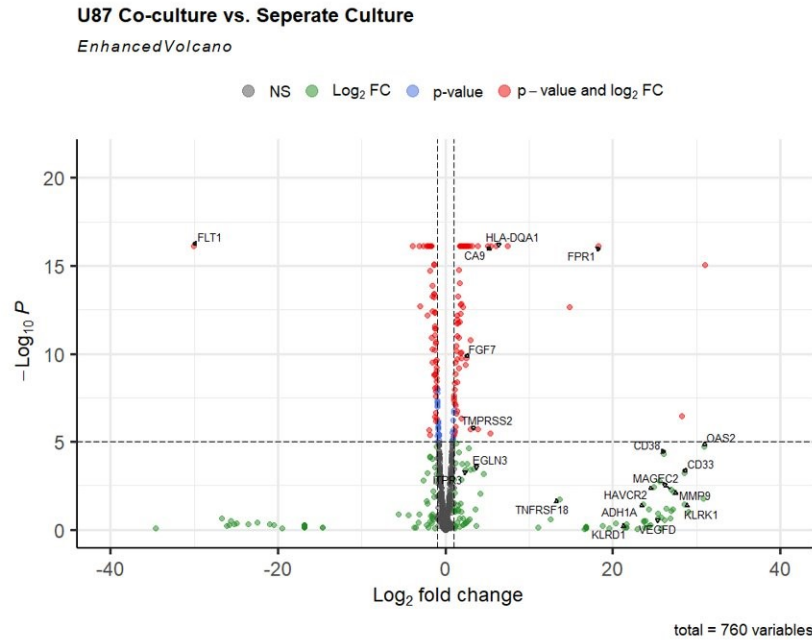

**Supplementary Figure 11.** Volcano plot of differential gene expression for U87 spheroid co-cultures with dispersed normal human astrocytes and U87 spheroid and astrocyte separate cultures. NS = not significant, Log<sub>2</sub> FC = log<sub>2</sub> fold change > 2, p-value = p-value value < 1E-5. (Note that software cannot detect p < 1E-12). p-value and log<sub>2</sub> FC = p value < 0.05 and log<sub>2</sub> FC > 2. The differential expression of these genes is considered statistically significant.

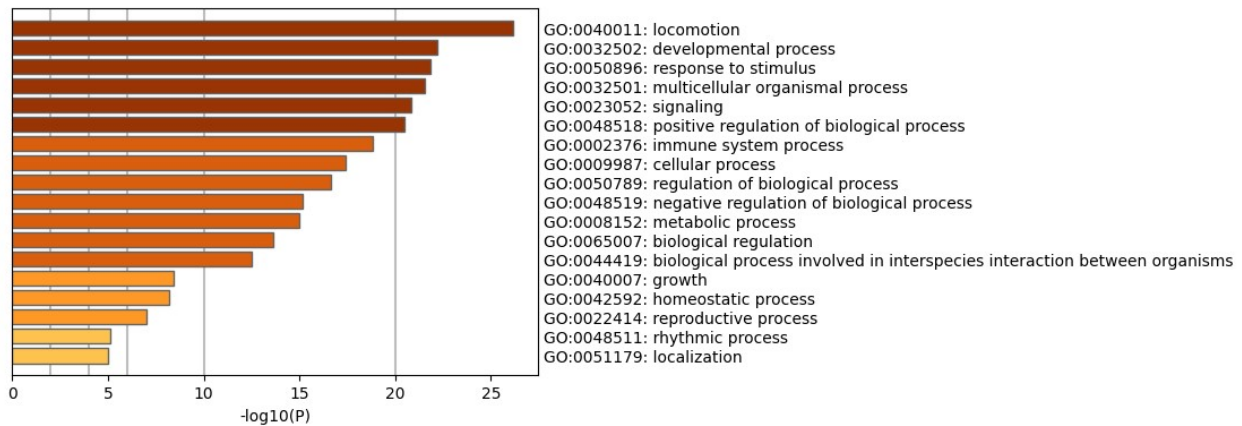

**Supplementary Figure 12.** Metascape Gene Ontology (GO) biological processes enrichment analysis of differentially expressed genes in LN229 vs. U87 mono-sphere cultures without astrocytes.

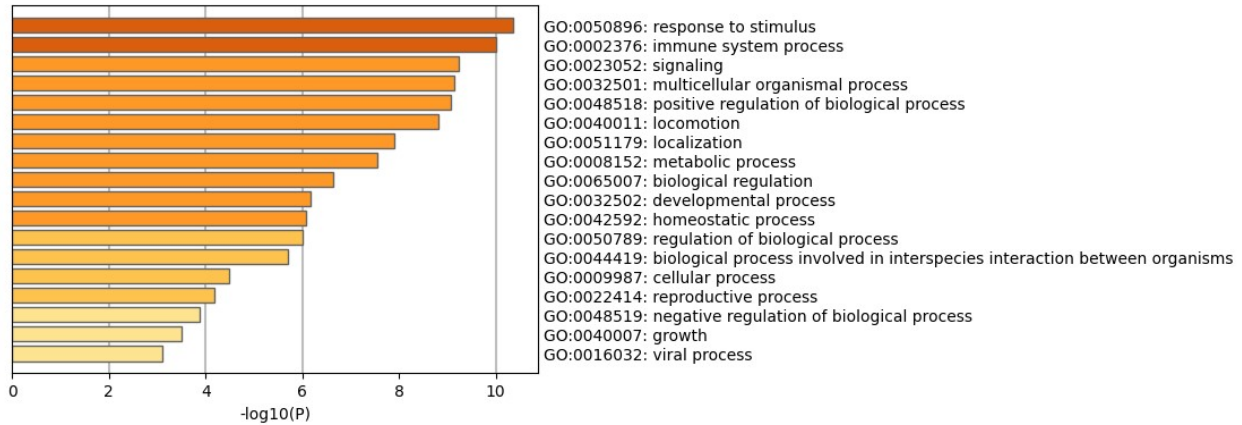

**Supplementary Figure 13.** Metascape Gene Ontology (GO) biological processes enrichment analysis of differentially expressed genes in U87 co-cultures vs. combined RNA from separate U87 and astrocyte cultures.

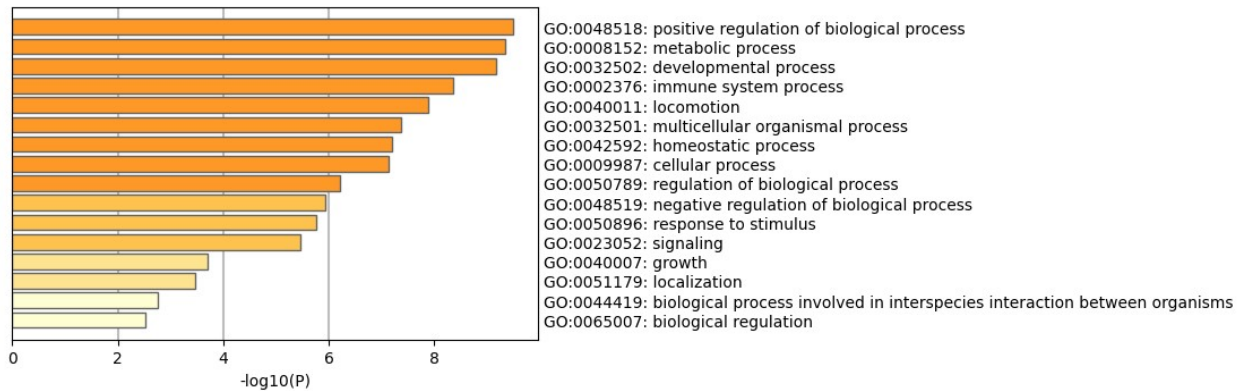

**Supplementary Figure 14.** Metascape Gene Ontology (GO) biological processes enrichment analysis of differentially expressed genes in LN229 co-cultures vs. combined RNA from separate U87 and astrocyte cultures.

**Supplementary Table 1.** Contribution of variables to principal components (PC) from principal component analysis (PCA).

|                    | U87     |         | LN229   |         |
|--------------------|---------|---------|---------|---------|
|                    | PC1 (%) | PC2 (%) | PC1 (%) | PC2 (%) |
| sphere diameter    | 25.12   | 72.48   | 24.57   | 73.10   |
| migration capacity | 35.70   | 22.07   | 35.93   | 21.54   |
| ad-distance        | 39.18   | 5.45    | 39.40   | 5.36    |

**Supplementary Table 2:** Differentially Expressed Genes Between LN229 versus 87 spheroids in co-culture with dispersed normal human astrocytes. Log FC =  $\log_2$  fold change. Genes highlighted in gray are also differentially expressed in mono-sphere cultures without astrocytes at similar levels, and thus indicate differences between cell lines not astrocyte-related behaviors. \*p value = 0 indicates  $p < 1E-12$ .

| Gene     | Log FC | p value* |
|----------|--------|----------|
| BCL2A1   | 2.5    | 0        |
| BLK      | -29.1  | 0.0081   |
| C3AR1    | -24.9  | 5.8E-08  |
| CA9      | -3.9   | 0        |
| CBX2     | 2.7    | 3.1E-07  |
| CCL5     | -3.8   | 3.1E-11  |
| CCR1     | -29.8  | 5.6E-12  |
| CD22     | 30.4   | 0        |
| CSF2RA   | 25.5   | 0.0058   |
| EDN1     | -2.5   | 5.6E-06  |
| ERBB3    | 29.1   | 0        |
| FLT1     | 26.6   | 0        |
| FPR1     | -9.1   | 0        |
| HGF      | -2.3   | 0        |
| HLA-DQA1 | -2.2   | 0        |
| IL11     | -4.2   | 0        |
| IL6      | -5.6   | 0        |
| IL7R     | -26.6  | 2.7E-07  |
| ITGA5    | -2.1   | 0        |
| KLRD1    | 2.6    | 0.034    |
| KLRG1    | -2.0   | 0.0038   |
| KRT17    | -33.7  | 0        |
| LAMC2    | -2.2   | 3.3E-09  |
| LAT      | -3.8   | 0        |
| MAGEC2   | -31.8  | 5.1E-05  |
| NFATC2   | 2.9    | 0        |
| NKX3-1   | -2.1   | 7.4E-05  |
| OAS2     | -24.7  | 8.6E-09  |
| PTGS2    | -3.9   | 0        |
| TMPRSS2  | -30.2  | 0        |
| VEGFA    | -2.0   | 0        |

**Supplementary Table 3:** Differentially Expressed Genes Between LN229 versus U87 spheroids in mono-culture without astrocytes. Log FC = log<sub>2</sub> fold change. Genes highlighted in gray are also differentially expressed in spheroid co-cultures with astrocytes at similar levels, indicating cell lines differences. \*p value = 0 indicates p < 1E-12.

| Gene    | Log FC | p value* |         |       |         |          |       |         |
|---------|--------|----------|---------|-------|---------|----------|-------|---------|
| ABCC4   | -2.6   | 0        | FZD7    | 5.4   | 0       | PDCD1LG2 | -4.4  | 0       |
| ADM     | -2.5   | 0        | FZD8    | 2.2   | 3.5E-14 | PDGFB    | 25.7  | 0.022   |
| ADORA2A | -2.4   | 0        | GALNT3  | 3.5   | 9.2E-13 | PDGFRA   | 2.9   | 1.8E-08 |
| ALK     | -27.8  | 0.0049   | GPNMB   | 6.2   | 0       | PDGFRB   | -2.8  | 0       |
| BCL2    | 2.6    | 9.0E-14  | GRAP2   | 3.2   | 0.023   | PFKP     | -2.2  | 0       |
| BCL2A1  | 4.6    | 0        | GREM1   | -8.8  | 0       | PGF      | 3.0   | 0       |
| BIRC3   | -3.1   | 0.038    | HGF     | -36.8 | 0       | PIK3CD   | -5.2  | 0       |
| BLK     | -29.8  | 0        | HLA-B   | -2.6  | 0       | PLAU     | -10.3 | 0       |
| C3AR1   | -28.5  | 2.4E-12  | HSD11B1 | -29.9 | 2.1E-09 | PLEK2    | -29.7 | 6.2E-14 |
| CA9     | -35.9  | 0        | IFNGR2  | 2.5   | 0       | PRKCA    | -2.1  | 0       |
| CBX2    | 6.6    | 0        | IGF1R   | 3.1   | 0       | PTCH1    | 3.7   | 0       |
| CCL2    | 3.3    | 0        | IGFBP3  | 3.1   | 0       | PTCH2    | 22.9  | 0.0040  |
| CCL5    | -3.5   | 5.4E-10  | IL10    | 31.4  | 0.049   | PTGER2   | -3.3  | 1.3E-09 |
| CD22    | 33.2   | 0        | IL11    | -4.3  | 0       | PTGS2    | -2.2  | 0       |
| CD274   | -4.4   | 0        | IL6     | -10.6 | 0       | RAC3     | 2.3   | 0       |
| CD38    | 2.9    | 0.021    | IL7     | -3.0  | 0       | SELL     | 4.6   | 3.3E-07 |
| CD40    | -7.4   | 0        | IL7R    | -4.1  | 0       | SERPINE1 | -8.5  | 0       |
| CD53    | -2.8   | 0.0017   | INHBA   | 5.7   | 0       | SIRPA    | 2.3   | 0       |
| CD6     | -30.1  | 1.2E-12  | ITGA11  | 3.1   | 0       | SLC7A5   | 2.2   | 0       |
| CD68    | -5.4   | 0        | ITGA5   | -2.0  | 0       | SLIT2    | 2.0   | 0       |
| CD80    | 26.8   | 0.0085   | ITGAX   | -4.1  | 0       | SMO      | 34.0  | 0       |
| CDCP1   | -31.2  | 6.7E-11  | ITGB8   | 5.1   | 0       | SNAI1    | 4.9   | 0       |
| CDH11   | 4.7    | 0        | ITK     | -6.0  | 0       | SOCS1    | -2.8  | 0       |
| CEACAM1 | 29.4   | 4.5E-12  | ITPR1   | -3.3  | 0       | SOX2     | 28.9  | 0       |
| COL4A1  | 32.6   | 0        | JUN     | -2.5  | 0       | SPINT1   | 29.7  | 0       |
| COL4A2  | 8.6    | 0        | KDR     | -28.9 | 2.7E-09 | STAT4    | -2.4  | 2.3E-05 |
| COL6A3  | -9.8   | 0        | KIT     | 28.0  | 0       | STING1   | 29.8  | 0       |
| CSF2RA  | 30.6   | 0        | KLRG1   | -28.5 | 9.5E-06 | TEK      | -3.6  | 1.4E-05 |
| CTLA4   | 26.4   | 6.8E-05  | LAG3    | 2.6   | 0.0027  | TERT     | 27.3  | 0.049   |
| CYBB    | 30.4   | 0.029    | LAIR1   | 27.7  | 6.7E-08 | THBS1    | 3.9   | 0       |
| DCN     | 2.4    | 0        | LAMA2   | -27.4 | 1.1E-15 | THBS2    | 3.5   | 0       |
| DOCK2   | -4.4   | 0        | LAMA4   | 5.7   | 0       | TLR3     | 2.0   | 0       |
| EHHADH  | 2.9    | 0        | LAMB1   | 2.5   | 0       | TLR4     | 31.8  | 0       |
| ENTPD1  | 23.2   | 0.00020  | LAMC1   | 2.2   | 0       | TMPRSS2  | 4.2   | 0.022   |
| EPCAM   | -23.4  | 0.033    | LAT     | -4.5  | 0       | TNFRSF9  | -6.4  | 0       |
| ERBB2   | 4.6    | 0        | LCN2    | 4.0   | 0       | TNFSF14  | -2.2  | 1.0E-06 |
| ERBB3   | 35.1   | 0        | LOX     | -12.9 | 0       | TOX3     | 23.5  | 2.3E-05 |
| FCRL2   | 26.0   | 0.036    | LRRC32  | -5.8  | 7.7E-13 | TP53     | 2.4   | 0       |
| FGF7    | -2.9   | 0        | LTBP1   | -3.8  | 0       | TP73     | 4.7   | 8.9E-10 |
| FGFR3   | 29.8   | 0.0015   | LY96    | -5.6  | 0       | TSPAN1   | -4.3  | 0       |
| FLT1    | 32.5   | 0        | MAGEC2  | -25.1 | 5.2E-13 | VEGFA    | -5.4  | 0       |
| FOLH1   | 29.3   | 2.8E-05  | MET     | -2.6  | 0       | VEGFC    | -7.0  | 0       |
| FOS     | 2.3    | 9.2E-06  | MYC     | -2.2  | 0       | WWTR1    | 2.6   | 0       |
| FOXP1   | -7.9   | 0        | MYL9    | -27.4 | 0       |          |       |         |
| FPR1    | -30.2  | 0        | NFATC2  | 6.9   | 0       |          |       |         |
| FZD1    | 3.2    | 0        | NOTCH3  | -28.4 | 3.3E-16 |          |       |         |
| FZD4    | 26.4   | 0.0028   | NT5E    | -2.6  | 0       |          |       |         |
|         |        |          | OAS1    | 3.0   | 3.3E-16 |          |       |         |

**Supplementary Table 4:** Differentially Expressed Genes between U87 spheroid co-cultures with dispersed normal human astrocytes versus U87 spheroid and astrocyte separate cultures. Log FC = log<sub>2</sub> fold change. Genes highlighted in gray are also differentially expressed in LN229 co-cultures vs. separate cultures at similar levels, indicating behaviors that are the same for both cell lines. \*p value = 0 indicates p < 1E-12.

| Gene     | Log FC | p value* |
|----------|--------|----------|
| ACTG2    | -3.9   | 0        |
| ADH1A    | 23.6   | 0.037    |
| ADM      | 2.7    | 0        |
| AMOTL2   | -2.2   | 0.023    |
| BCL2A1   | 4.6    | 0.00070  |
| CA9      | 5.4    | 0        |
| CCL5     | 5.4    | 3.2E-06  |
| CCR1     | 3.0    | 0.00041  |
| CD33     | 28.5   | 0.00061  |
| CD38     | 26.1   | 5.1E-05  |
| EDN1     | -2.1   | 6.9E-13  |
| EGF      | 2.6    | 0.00018  |
| EGLN3    | 3.4    | 0.00035  |
| EOMES    | -2.6   | 0.0015   |
| EPAS1    | 2.1    | 0        |
| FGF7     | 2.5    | 1.8E-10  |
| FLT1     | -30.1  | 0        |
| FPR1     | 18.3   | 0        |
| GPNMB    | 2.1    | 0        |
| HAVCR2   | 24.9   | 0.0036   |
| HGF      | 2.4    | 0        |
| HLA-B    | 2.4    | 0        |
| HLA-DQA1 | 6.0    | 0        |
| HLA-DRB1 | 2.6    | 0        |
| HSD11B1  | 31.1   | 8.9E-16  |
| ICAM1    | 7.5    | 0        |
| IDO1     | 25.6   | 0.0017   |
| IL3RA    | -2.1   | 0.033    |

|          |      |          |
|----------|------|----------|
| IL7      | 2.8  | 2.3E-05  |
| INHBA    | -2.6 | 0        |
| ITGA8    | 3.2  | 0        |
| ITPR3    | 2.4  | 0.00038  |
| JAG1     | -3.1 | 0        |
| KIT      | -3.1 | 1.9E-13  |
| KLRG1    | 4.1  | 0.0090   |
| KLRK1    | 28.5 | 0.036    |
| KRT17    | 5.0  | 0        |
| LAT      | 2.4  | 4.9E-10  |
| LCN2     | 14.9 | 2.2E-13  |
| LY96     | 2.5  | 0        |
| MAGEC2   | 27.0 | 0.0053   |
| MMP9     | 27.3 | 0.0072   |
| OAS1     | 3.9  | 2.0E-06  |
| OAS2     | 31.0 | 1.9E-05  |
| PIK3R1   | 2.1  | 0        |
| PLAU     | -2.9 | 0        |
| PTGS2    | 2.9  | 0        |
| SDC1     | -2.3 | 0        |
| SHH      | 30.8 | 0.017    |
| STAT4    | 2.0  | 0.00018  |
| TLR3     | 3.0  | 1.6E-11  |
| TMPRSS2  | 3.0  | 2.0E-06  |
| TNFRSF18 | 13.6 | 0.019    |
| TNFSF11  | 3.9  | 0        |
| TNFSF13B | 28.2 | 3.4E-07  |
| TNS1     | -2.2 | 0.00057  |
| TPD52    | 2.1  | 2.24E-13 |
| VEGFA    | 2.0  | 0        |

**Supplementary Table 5:** Differentially Expressed Genes between LN229 spheroid co-cultures with dispersed normal human astrocytes versus LN229 spheroid and astrocyte separate cultures. Log FC =  $\log_2$  fold change. Genes highlighted in gray are also differentially expressed in U87 co-cultures vs. separate cultures at similar levels, indicating behaviors that are the same for both cell lines. \*p value = 0 indicates  $p < 1E-12$ .

| Gene     | Log FC | p value* |
|----------|--------|----------|
| ACKR3    | -4.0   | 6.2E-15  |
| ACTG2    | -2.8   | 0        |
| ADM      | 3.5    | 0        |
| ALDH1A3  | 2.3    | 0        |
| AMOTL2   | -2.9   | 0.00069  |
| BCL2     | 2.8    | 6.3E-05  |
| BCL2A1   | 2.5    | 4.0E-14  |
| CA9      | 28.2   | 6.2E-07  |
| CD22     | 5.7    | 0        |
| DCN      | 2.2    | 0        |
| DOCK2    | -2.0   | 0.00064  |
| E2F2     | -2.6   | 0.020    |
| EDN1     | -4.4   | 0        |
| EGLN3    | 26.1   | 0.014    |
| ERBB3    | 3.3    | 0        |
| ESR2     | 2.0    | 0        |
| FAS      | 2.2    | 5.5E-07  |
| FGF7     | 28.2   | 4.9E-08  |
| GPNMB    | 3.1    | 0        |
| GREM1    | -2.2   | 0        |
| HGF      | 5.7    | 0        |
| HLA-DQA1 | 27.7   | 2.0E-08  |
| HLA-DRB1 | 2.6    | 0        |
| HSD11B1  | 34.7   | 7.0E-07  |
| ICAM1    | 4.2    | 0        |
| IDO1     | 26.7   | 0.0062   |
| IL11     | -2.1   | 0        |
| IL6      | -3.0   | 0        |
| INHBA    | -2.7   | 0        |
| ITGA5    | -2.0   | 0        |
| ITGA8    | 7.8    | 0        |
| ITGB8    | 2.3    | 0        |
| ITPR3    | 28.1   | 2.4E-08  |
| JAG1     | -2.8   | 0        |
| KAT2B    | 3.0    | 0        |
| KLRD1    | 28.4   | 0.0044   |
| LCN2     | 5.9    | 0        |
| LYN      | 2.6    | 0.0020   |
| MDM2     | 2.2    | 0        |
| NOTCH3   | -2.9   | 4.4E-13  |
| OAS1     | 3.8    | 0.0021   |
| PIK3R1   | 2.1    | 0        |
| PLAU     | -2.2   | 0        |
| PLEK2    | -4.6   | 3.3E-05  |
| PLK1     | -2.1   | 0        |
| PTCH1    | 2.3    | 3.6E-06  |
| SERPINE1 | -2.1   | 0        |
| SHH      | 24.7   | 0.038    |
| SNAI2    | -3.1   | 0        |
| SOCS1    | -2.5   | 0        |
| TCF7     | -2.1   | 0.0024   |

|          |       |         |
|----------|-------|---------|
| TMPRSS2  | -28.9 | 0.034   |
| TNFSF11  | 3.8   | 0       |
| TNFSF13B | 19.9  | 0.00070 |
| VEGFD    | 26.4  | 0.017   |

**Supplementary Video 1.** Time lapse video of U87 mono-sphere after gel encapsulation. Scale Bar = 100  $\mu\text{m}$ .
